# Supplementary material
Source: ML conference proceedings conference paper supplement (https://proceedings.mlr.press/v97/wilkinson19a.html)
Supplement: Supplementary file [file wilkinson19a-supp.pdf]

---

## Supplementary Material for End-to-End Probabilistic Inference for Nonstationary Audio Analysis

---

In this appendix we show further details regarding the globally iterated extended Kalman filter algorithm and the derivations for moment matching in expectation propagation.

### A. Global Iterated Extended Kalman Filter

Alg. 2 provides pseudo code for the inference algorithm that uses the classical extended Kalman filtering method.

---

**Algorithm 2** Linearisation-based inference (Laplace approximation scheme) formulated as a global iterated extended Kalman filter.

---

**Input:**  $\{t_k\}$ ,  $\mathbf{y}$ ,  $\mathbf{A}$ ,  $\mathbf{Q}$ ,  $\mathbf{P}_0$  data and state space model  
 $h(\mathbf{x})$ ,  $\mathbf{H}_x(\mathbf{x})$  measurement model and Jacobian  
 $\mathbf{m}_0 \leftarrow \mathbf{0}$  init state mean  
**while** not converged **do** iterated EKF loop  
  **for**  $k = 1$  to  $T$  **do** forward pass  
    **if**  $k == 1$  **then**  
       $\mathbf{P}_k \leftarrow \mathbf{P}_0$  init state covariance  
    **else**  
       $\mathbf{m}_k \leftarrow \mathbf{A} \mathbf{m}_{k-1}$ ;  $\mathbf{P}_k \leftarrow \mathbf{A} \mathbf{P}_{k-1} \mathbf{A}^\top + \mathbf{Q}$  predict  
    **end if**  
    **if** has label  $y_k$  **then**  
       $v_k \leftarrow y_k - h(\mathbf{m}_k)$ ;  $S_k \leftarrow \mathbf{H}_x \mathbf{P}_k \mathbf{H}_x^\top + \sigma_y^2$  inn.  
       $\mathbf{k}_k \leftarrow \mathbf{P}_k \mathbf{H}_x^\top S_k^{-1}$  gain  
       $\mathbf{m}_k \leftarrow \mathbf{m}_k + \mathbf{k}_k v_k$ ;  $\mathbf{P}_k \leftarrow \mathbf{P}_k - \mathbf{k}_k S_k \mathbf{k}_k^\top$   
    **end if**  
  **end for**  
  **for**  $k = T - 1$  to  $1$  **do** backward pass  
     $\mathbf{G}_k \leftarrow \mathbf{P}_k \mathbf{A}^\top (\mathbf{A} \mathbf{P}_k \mathbf{A}^\top + \mathbf{Q})^{-1}$  gain  
     $\mathbf{m}_k \leftarrow \mathbf{m}_k + \mathbf{G}_k (\mathbf{m}_{k+1} - \mathbf{A} \mathbf{m}_k)$   
     $\mathbf{P}_k \leftarrow \mathbf{P}_k + \mathbf{G}_k (\mathbf{P}_{k+1} - \mathbf{A} \mathbf{P}_k \mathbf{A}^\top - \mathbf{Q}) \mathbf{G}_k^\top$   
  **end for**  
**end while**  
  measurement row vector  $\mathbf{h}_n^g$  selects  $g_n$  from the state  
**Return:**  $\mathbb{E}[g_n(t_k)] = \mathbf{h}_n^g \mathbf{m}_k$ ;  $\mathbb{V}[g_n(t_k)] = \mathbf{h}_n^g \mathbf{P}_k \mathbf{h}_n^{g\top}$   
 $\mathbb{E}[z_d(t_k)] = \mathbf{h}_d^z \mathbf{m}_k$ ;  $\mathbb{V}[z_d(t_k)] = \mathbf{h}_d^z \mathbf{P}_k \mathbf{h}_d^{z\top}$   
 $\log p(\mathbf{y} | \boldsymbol{\theta}) \simeq - \sum_{k=1}^T \frac{1}{2} (\log 2\pi S_k + v_k^2 / S_k)$

---

### B. Additional Derivations for EP

The normalisation constant required for calculating the posterior in GTF-NMF, as described in Sec. 3.4, is:

$$\begin{aligned}
Z_k &= \mathbb{E}_{q_{-k}} [p(y_k | \mathbf{g}_k, \mathbf{z}_k)^\eta] \\
&= \int \dots \int \mathbb{N}\left(y_k | \sum_d \sum_n W_{d,n} \psi(g_{n,k}) z_{d,k}, \sigma_y^2\right)^\eta \\
&\quad \times \prod_d \mathbb{N}(z_{d,k} | \mu_{d,-k}^z, \zeta_{d,-k}^z) \\
&\quad \times \prod_n \mathbb{N}(g_{n,k} | \mu_{n,-k}^g, \zeta_{n,-k}^g) dz_{1,k} \dots dz_{D,k} dg_{1,k} \dots dg_{N,k} \\
&= \text{const}_\eta \int \dots \int \mathbb{N}\left(y_k | \sum_d \sum_n W_{d,n} \psi(g_{n,k}) \mu_{d,-k}^z, \sigma_y^2 + \sum_d \sum_n W_{d,n}^2 \psi(g_{n,k})^2 \zeta_{d,-k}^z\right) \\
&\quad \times \prod_n \mathbb{N}(g_{n,k} | \mu_{n,-k}^g, \zeta_{n,-k}^g) dg_{1,k} \dots dg_{N,k}
\end{aligned}$$

for  $\text{const}_\eta = (2\pi\sigma_y^2)^{1/2(1-\eta)} \eta^{-1/2}$  and where we have used the marginalisation properties of the Gaussian distribution to obtain the last line.

Setting

$$m_y = \sum_d \sum_n W_{d,n} \psi(g_{n,k}) \mu_{d,-k}^z$$

and

$$v_y = \sigma_y^2 + \sum_d \sum_n W_{d,n}^2 \psi(g_{n,k})^2 \zeta_{d,-k}^z$$

and differentiating w.r.t.  $\mu^z, \mu^g$ , we get

$$\begin{aligned}
\frac{dZ_k}{d\mu_{d,-k}^z} &= \text{const}_\eta \int \dots \int \mathbb{N}(y_k | m_y, v_y) \\
&\quad \times \sum_n W_{d,n} \psi(g_{n,k}) \frac{y - m_y}{v_y} \\
&\quad \times \prod_n \mathbb{N}(g_{n,k} | \mu_{n,-k}^g, \zeta_{n,-k}^g) dg_{1,k} \dots dg_{N,k},
\end{aligned}$$

$$\frac{dZ_k}{d\mu_{n,-k}^g} = \text{const}_\eta \int \dots \int \mathbb{N}(y_k | m_y, v_y) \frac{g_{n,k} - \mu_{n,-k}^g}{\zeta_{n,-k}^g} \\ \times \prod_n \mathbb{N}(g_{n,k} | \mu_{n,-k}^g, \zeta_{n,-k}^g) dg_{1,k} \dots dg_{N,k},$$

$$\frac{d^2 Z_k}{d\mu_{d,-k}^z{}^2} = \text{const}_\eta \int \dots \int \mathbb{N}(y_k | m_y, v_y) \\ \times \sum_n (W_{d,n} \psi(g_{n,k}))^2 \left[ \left( \frac{y - m_y}{v_y} \right)^2 - \frac{1}{v_y} \right] \\ \times \prod_n \mathbb{N}(g_{n,k} | \mu_{n,-k}^g, \zeta_{n,-k}^g) dg_{1,k} \dots dg_{N,k},$$

$$\frac{d^2 Z_k}{d\mu_{n,-k}^g{}^2} = \text{const}_\eta \int \dots \int \mathbb{N}(y_k | m_y, v_y) \\ \times \left[ \left( \frac{g_{n,k} - \mu_{n,-k}^g}{\zeta_{n,-k}^g} \right)^2 - \frac{1}{\zeta_{n,-k}^g} \right] \\ \times \prod_n \mathbb{N}(g_{n,k} | \mu_{n,-k}^g, \zeta_{n,-k}^g) dg_{1,k} \dots dg_{N,k}.$$

We can see from the above that all the required integrals are  $N$ -dimensional, where  $N$  is the number of NMF components.

The partial derivatives of  $\log Z_k$  can be obtained from the equations above using the chain rule:

$$\frac{d \log Z_k}{d\mu_{d,-k}^z} = \frac{1}{Z_k} \frac{dZ_k}{d\mu_{d,-k}^z}, \\ \frac{d \log Z_k}{d\mu_{n,-k}^g} = \frac{1}{Z_k} \frac{dZ_k}{d\mu_{n,-k}^g}, \\ \frac{d^2 \log Z_k}{d\mu_{d,-k}^z{}^2} = -\frac{1}{Z_k^2} \left( \frac{dZ_k}{d\mu_{d,-k}^z} \right)^2 + \frac{1}{Z_k} \frac{d^2 Z_k}{d\mu_{d,-k}^z{}^2}, \\ \frac{d^2 \log Z_k}{d\mu_{n,-k}^g{}^2} = -\frac{1}{Z_k^2} \left( \frac{dZ_k}{d\mu_{n,-k}^g} \right)^2 + \frac{1}{Z_k} \frac{d^2 Z_k}{d\mu_{n,-k}^g{}^2}.$$

We use these derivatives to update the site parameters in Eq. (15), whilst also converting them back to the precision-adjusted (natural) parameter space, via the following mapping: letting  $b_{d,k} = \frac{d \log Z_k}{d\mu_{d,-k}^z}$  and  $c_{d,k} = \frac{d^2 \log Z_k}{d\mu_{d,-k}^z{}^2}$  and for damping parameter  $\rho$ ,

$$\tau_{d,k}^z = (1 - \rho) \tau_{d,k}^z + \frac{\rho}{\eta} \left( \frac{-c_{d,k}}{1 + \zeta_{d,-k} c_{d,k}} \right), \\ \nu_{d,k}^z = (1 - \rho) \nu_{d,k}^z + \frac{\rho}{\eta} \left( \frac{b_{d,k} - \mu_{d,-k} c_{d,k}}{1 + \zeta_{d,-k} c_{d,k}} \right).$$

Mapping to the natural parameter space in this way makes the updates in the EP algorithm more straightforward (see Alg. 1). The updates for  $\tau_{n,k}^g$  and  $\nu_{n,k}^g$  are carried out similarly using the derivatives with respect to  $\mu_{n,-k}^g$ .

### C. List of Example Audio Samples Used in Experiments

Table 2. Audio samples used in the experiments. Recordings are mono, 16kHz sample rate.

| #  | Sample description   | Length [ms] |
|----|----------------------|-------------|
| 01 | speech 1 - male      | 723         |
| 02 | speech 2 - male      | 595         |
| 03 | speech 3 - male      | 941         |
| 04 | speech 4 - male      | 854         |
| 05 | speech 5 - male      | 514         |
| 06 | speech 6 - female    | 769         |
| 07 | speech 7 - female    | 731         |
| 08 | speech 8 - female    | 959         |
| 09 | speech 9 - female    | 1270        |
| 10 | speech 0 - female    | 1455        |
| 11 | bamboo flute         | 2980        |
| 12 | cello                | 3300        |
| 13 | clarinet             | 2020        |
| 14 | flute                | 2000        |
| 15 | guitar               | 2652        |
| 16 | ocarina              | 1366        |
| 17 | piano                | 1846        |
| 18 | piccolo              | 1773        |
| 19 | saxophone            | 2296        |
| 20 | toy accordion        | 1671        |
| 21 | piano note C         | 2000        |
| 22 | piano note E         | 2000        |
| 23 | piano note G         | 2000        |
| 24 | piano chord mixture  | 6000        |
| 25 | piano ground truth C | 6000        |
| 26 | piano ground truth E | 6000        |
| 27 | piano ground truth G | 6000        |
